# Supplementary material
Source: publisher figshare collection journal article supplement (https://acs.figshare.com/ndownloader/files/9171796)
Supplement: Supplementary file 1 [file 9171796]

**Visible-light Self-powered Photodetector and Recoverable  
Photocatalyst Fabricated from Vertically Aligned Sn<sub>3</sub>O<sub>4</sub> Nanoflakes  
on Carbon Paper**

Weiwei Xia<sup>Ta</sup>, Haoyu Qian<sup>Ta</sup>, Xianghua Zeng<sup>a\*</sup>, Jing Dong<sup>a</sup>, Juan Wang<sup>b</sup>, Qin Xu<sup>b</sup>

<sup>a</sup> *College of Physics Science and Technology & Institute of Optoelectronic Technology, Yangzhou University, Yangzhou 225002, P.R. China*

<sup>b</sup> *College of Chemistry and Chemical Engineering, Yangzhou University, Yangzhou 225002, P.R. China*

Supporting Information

**A. High resolution SEM images of 3-D hierarchal  $\text{Sn}_3\text{O}_4$  structures**

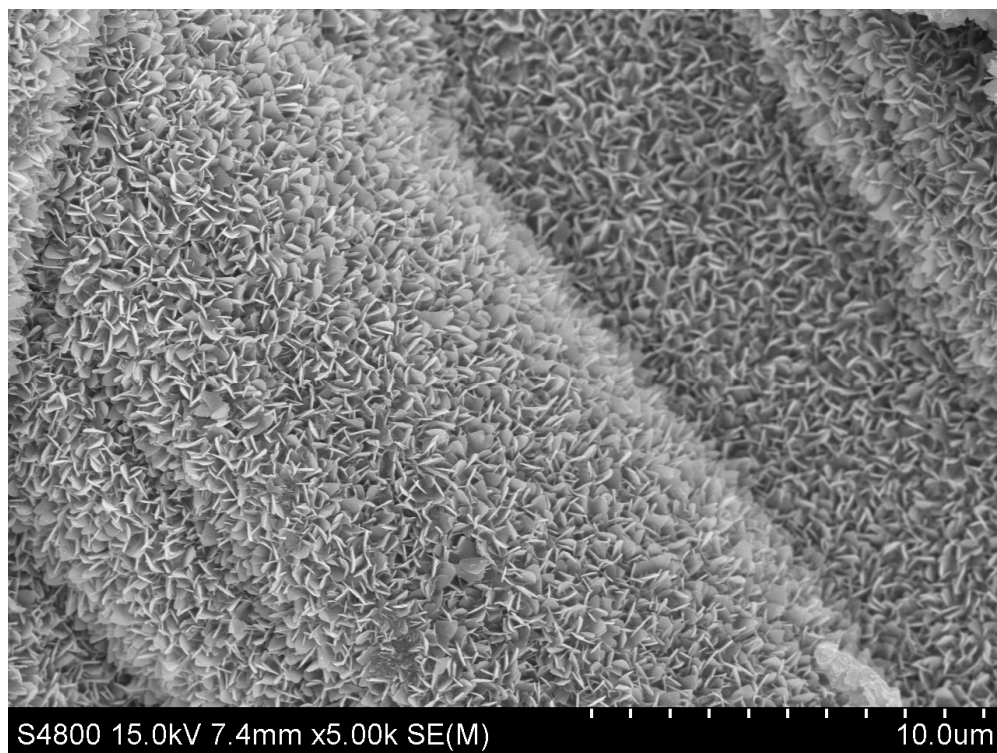

**Figure S1** SEM images 3-D hierarchal  $\text{Sn}_3\text{O}_4$  structures.

**B. SEM image and XRD pattern of carbon fiber paper**

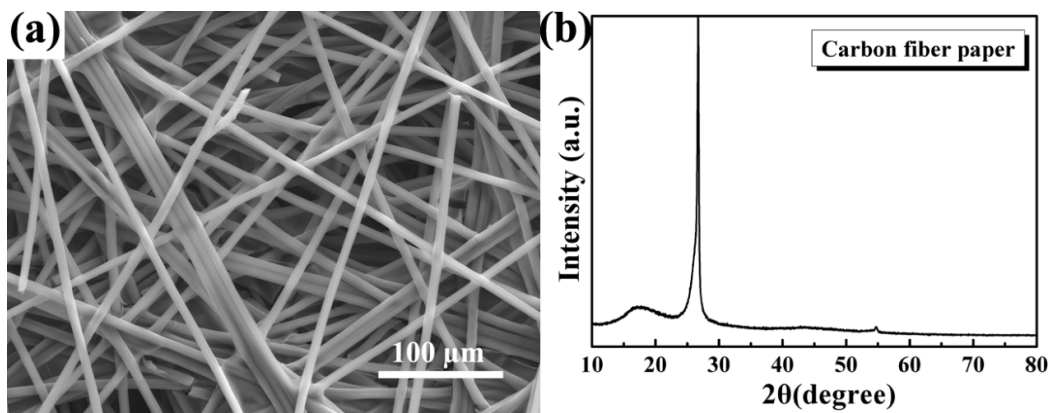

**Figure S2** (a) SEM image of carbon fiber paper; (b) XRD pattern of carbon fiber paper.

### C. Photocurrent responses

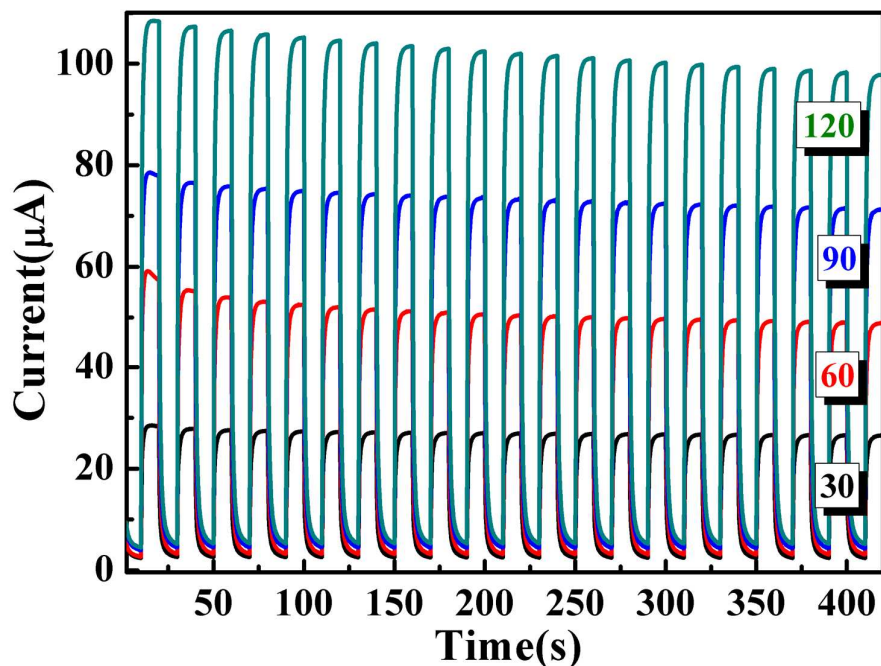

Figure S3. Photocurrent response under on/off of 10 s at 0.0 V vs. Ag/AgCl for incident intensity equal to 30, 60, 90 and 120 mW/cm<sup>2</sup> with 20 cycle runs.

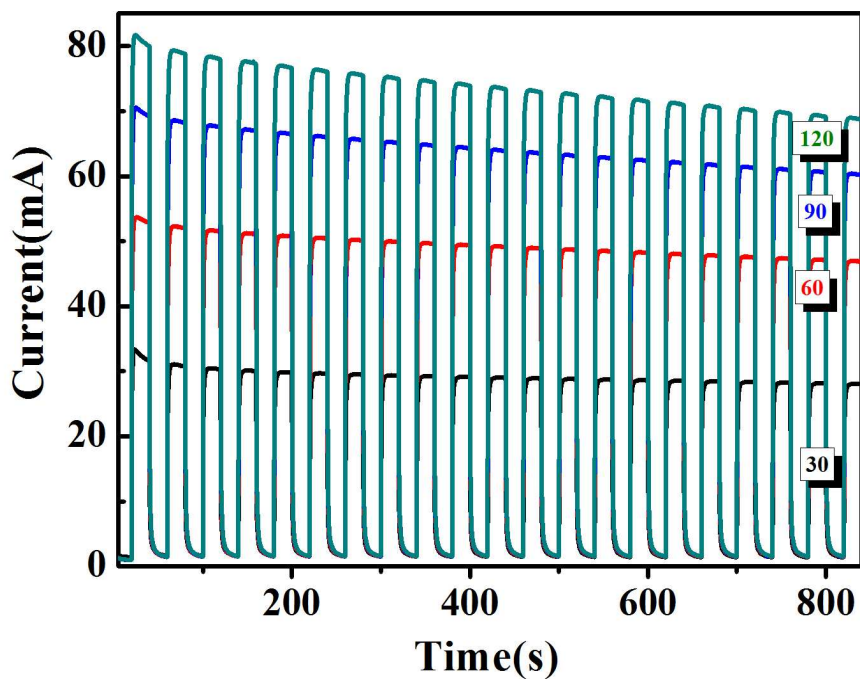

Figure S4. Photocurrent response under on/off of 20 s at 0.0 V vs. Ag/AgCl for incident intensity equal to 30, 60, 90 and 120 mW/cm<sup>2</sup> with 20 cycle runs.



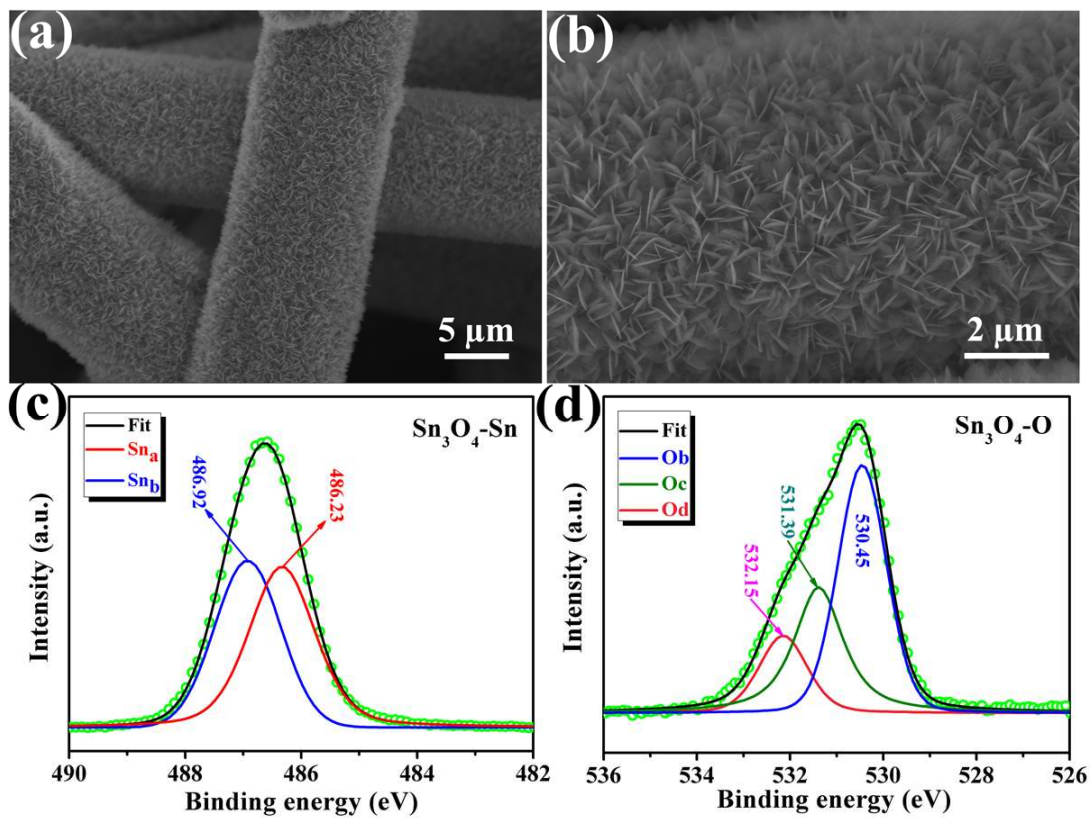

**Figure S5** (a) and (b) low-magnification SEM and magnified SEM images; (c) High-resolution Sn 3d spectra; (e) High-resolution O 1s spectra for  $\text{Sn}_3\text{O}_4$  microstructures after PEC reaction.
